# Supplementary material for: Phosphoproteomic screening identifies physiological substrates of the CDKL5 kinase
Source: PubMed Central journal article supplement (PMC6293279; doi:10.15252/embj.201899559), 2018-09-28

Figure 5

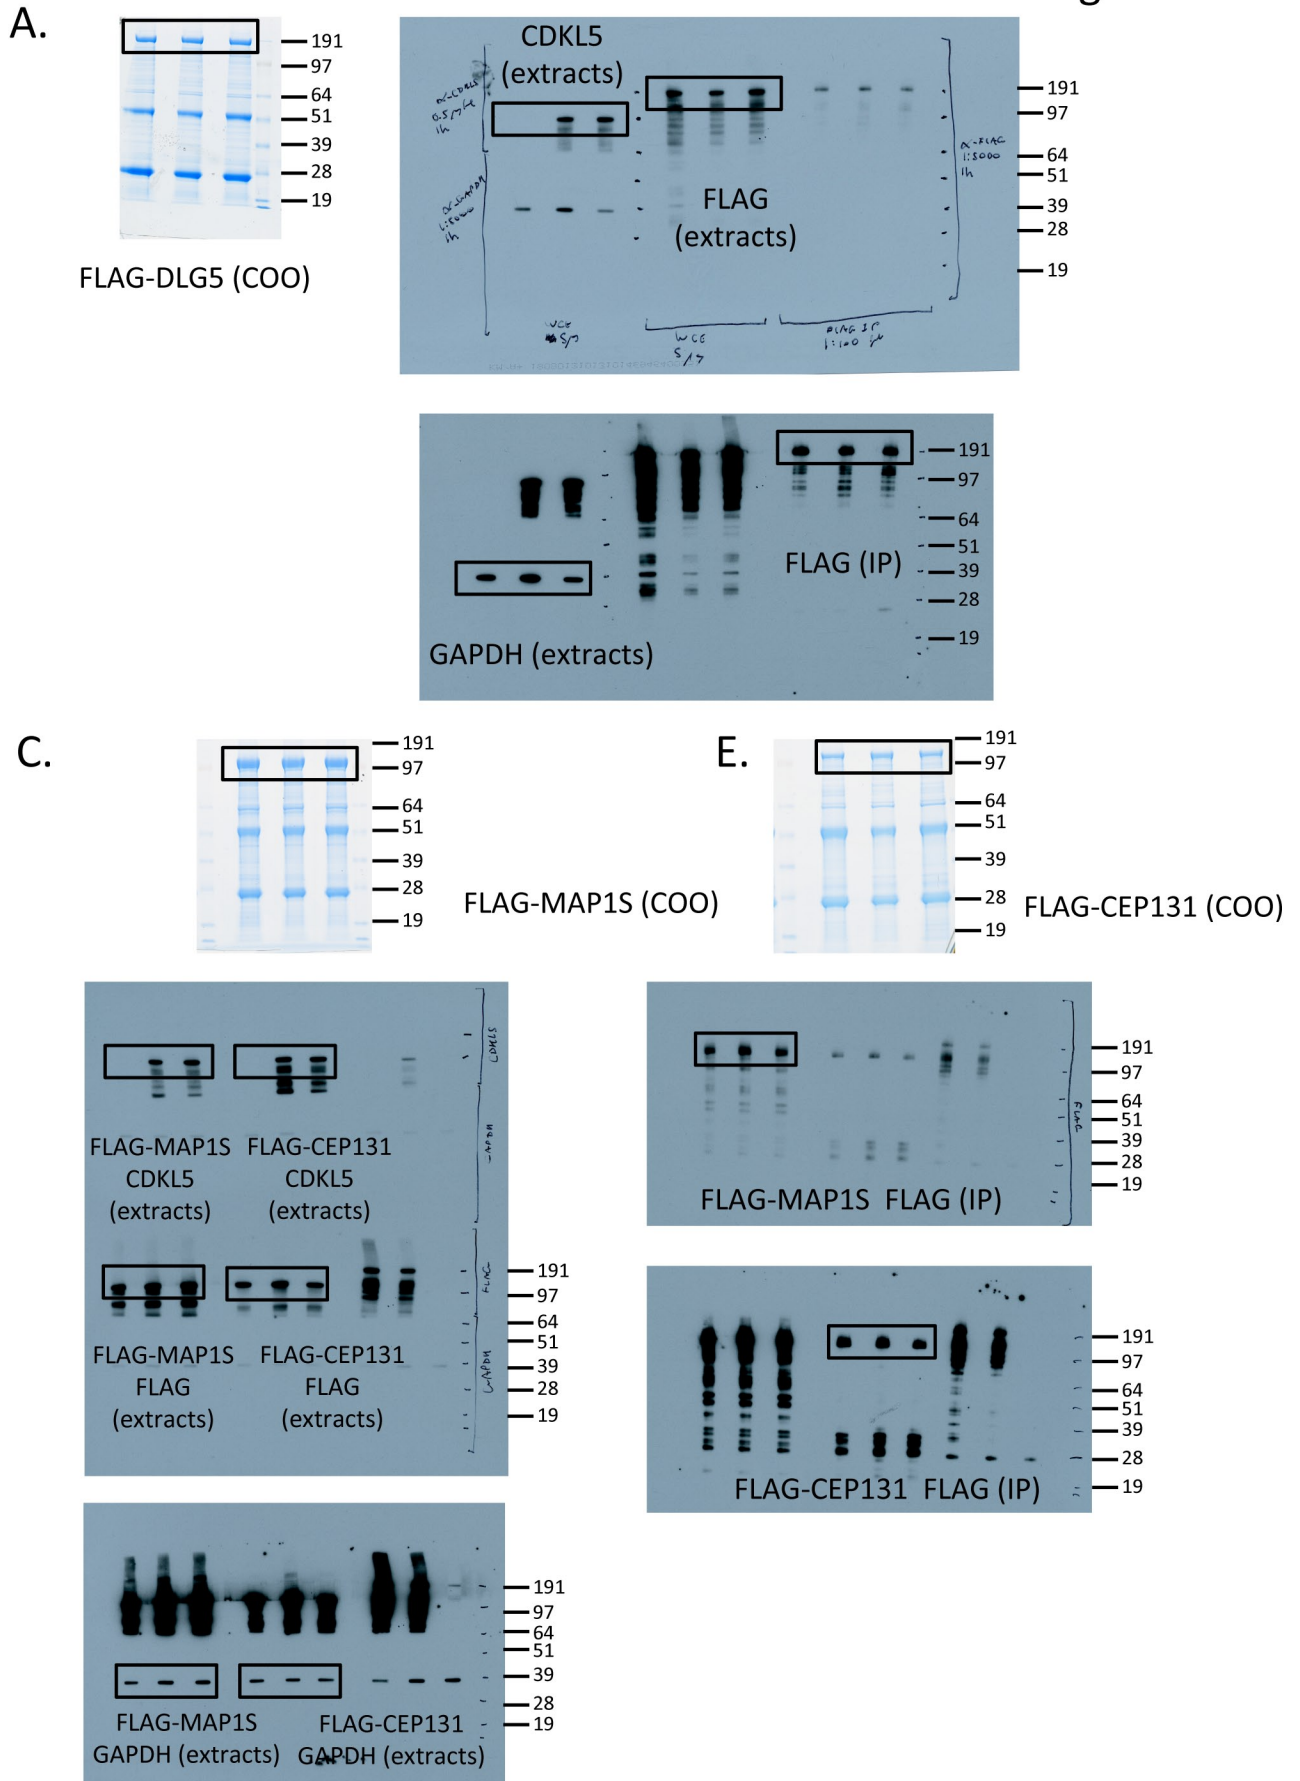

Supplement: EMBJ-37-e99559-s011.pdf [file EMBJ-37-e99559-s011.pdf]
